# Supplementary material
Source: publisher figshare collection journal article supplement (https://sage.figshare.com/ndownloader/files/11851973)
Supplement: Supplementary file 1 [file 11851973]

# Cost-effectiveness of Treating Severe Childhood Caries under General Anesthesia versus Conscious Sedation

J.M. Burgette and R.B. Quiñonez

## APPENDIX

**Appendix Table 1.** Theoretical Dental Treatment Needs for Severe Early Childhood Caries

| Tooth | Dental Treatment                                                                          |
|-------|-------------------------------------------------------------------------------------------|
| A     | Resin (O, Etch, Bond, Filtek Supreme A1 composite, Delton Opaque sealant)                 |
| B     | Stainless Steel Crown (Dycal, ION D3, Ketac Cement)                                       |
| D     | Resin Crown (Dycal, Etch, Bond, Filtek Supreme A1 composite, D2)                          |
| E     | Extract (Surgicel Fibrillar, Suture)                                                      |
| F     | Extract (Surgicel Fibrillar, Suture)                                                      |
| G     | Resin Crown (Dycal, Etch, Bond, Filtek Supreme A1 composite, G2)                          |
| I     | Pulpotomy & Stainless Steel Crown (Formocresol, Zinc Oxide Eugenol, ION D3, Ketac Cement) |
| J     | Resin (O, Etch, Bond, Filtek Supreme A1 composite, Delton Opaque sealant)                 |
| K     | Sealant (OF, Etch, Delton Opaque sealant)                                                 |
| L     | Sealant (OF, Etch, Delton Opaque sealant)                                                 |
| S     | Sealant (OF, Etch, Delton Opaque sealant)                                                 |
| T     | Sealant (OF, Etch, Delton Opaque sealant)                                                 |

**Appendix Table 2.** Supplement to Table 2: Detailed Micro-costing for the Treatment of Severe Early Childhood Caries under General Anesthesia and Conscious Sedation, 2011.

| Description                                    | Cost(\$) <sup>+</sup> | Source                                 |
|------------------------------------------------|-----------------------|----------------------------------------|
| <i>General Anesthesia Total Costs</i>          | <b><u>9159</u></b>    |                                        |
| New Patient Exam                               |                       |                                        |
| D0140 <sup>a</sup> —Limited Oral Evaluation    | <b>40</b>             | Graduate Pediatric Clinic <sup>e</sup> |
| Pre-Operative Medical Appointment <sup>b</sup> | <b>200</b>            | UNC Hospitals <sup>f</sup>             |
| Hospital and Anesthesia                        | <b>6211</b>           |                                        |
| Operating Room                                 | 2149                  | UNC Hospitals                          |
| Supplies                                       | 700                   | UNC Hospitals                          |
| Anesthesia                                     | 800                   | UNC Hospitals                          |
| Anesthesia Support Staff                       | 1310                  | UNC Hospitals                          |
| Recovery Room                                  |                       |                                        |
| Phase I (30 minutes)                           | 811                   | UNC Hospitals                          |
| Phase I (30 minutes)                           | 441                   | UNC Hospitals                          |
| Treatment                                      | <b>2708</b>           |                                        |
| D0150 – Comprehensive Oral Exam                | 98                    | Dental Faculty Practice <sup>g</sup>   |
| D0210 – Intraoral Radiographs, Full Series     | 117                   | Dental Faculty Practice                |
| D1120 – Prophylaxis - child                    | 38                    | Dental Faculty Practice                |
| D1203 – Topical Fluoride                       | 26                    | Dental Faculty Practice                |
| D9420 – Hospital Call                          | 492                   | Dental Faculty Practice                |
| D2391 – Resin, 1-surface, posterior, #A(O)     | 163                   | Dental Faculty Practice                |
| D2391 – Resin, 1-surface, posterior, #J(O)     | 163                   | Dental Faculty Practice                |
| D7140 – Extract, erupted tooth, #E             | 113                   | Dental Faculty Practice                |
| D7140 – Extract, erupted tooth, #F             | 113                   | Dental Faculty Practice                |
| D2930 – Stainless Steel Crown, #B              | 282                   | Dental Faculty Practice                |
| D2930 – Stainless Steel Crown, #I              | 282                   | Dental Faculty Practice                |
| D3220 – Therapeutic Pulpotomy, #I              | 161                   | Dental Faculty Practice                |
| D2335 – Resin, 4+ surface, anterior, #D(MIDFL) | 216                   | Dental Faculty Practice                |
| D2335 – Resin, 4+ surface, anterior, #G(MIDFL) | 216                   | Dental Faculty Practice                |
| D1351 – Sealant, per tooth, #K                 | 57                    | Dental Faculty Practice                |
| D1351 – Sealant, per tooth, #L                 | 57                    | Dental Faculty Practice                |
| D1351 – Sealant, per tooth, #S                 | 57                    | Dental Faculty Practice                |
| D1351 – Sealant, per tooth, #T                 | 57                    | Dental Faculty Practice                |
| Complication (laryngospasm)                    |                       |                                        |
| Muscle relaxant                                | 100                   | UNC Hospitals                          |
| <i>Conscious Sedation Total Costs</i>          | <b><u>1763</u></b>    |                                        |

## Visit 1

### New Patient Exam

D0150 – Comprehensive Oral Exam **47** Graduate Pediatric Clinic

Physician Physical Evaluation<sup>c</sup> **120** UNC Hospitals

Treatment **532**

D0210 – Intraoral Radiographs, Full Series 76 Graduate Pediatric Clinic

D1120 – Prophylaxis - child 34 Graduate Pediatric Clinic

D1206 – Topical Fluoride Varnish 19 Graduate Pediatric Clinic

D2930 – Stainless Steel Crown, #I 152 Graduate Pediatric Clinic

D3220 – Therapeutic Pulpotomy, #I 98 Graduate Pediatric Clinic

D2391 – Resin, 1-surface, posterior, #J(O) 93 Graduate Pediatric Clinic

D1351 – Sealant, per tooth, #K 30 Graduate Pediatric Clinic

D1351 – Sealant, per tooth, #L 30 Graduate Pediatric Clinic

### Conscious Sedation

D9248 – Non-Intravenous Conscious Sedation<sup>d</sup> **75** Graduate Pediatric Clinic

## Visit 2

Treatment **534**

D2390 – Resin-based crown, anterior, #D 182 Graduate Pediatric Clinic

D7140 – Extract, erupted tooth, #E 85 Graduate Pediatric Clinic

D7140 – Extract, erupted tooth, #F 85 Graduate Pediatric Clinic

D2390 – Resin-based crown, anterior, #G 182 Graduate Pediatric Clinic

### Conscious Sedation

D9248 – Non-Intravenous Conscious Sedation **75** Graduate Pediatric Clinic

## Visit 3

Treatment **305**

D2391 – Resin, 1-surface, posterior, #A(O) 93 Graduate Pediatric Clinic

D2930 – Stainless Steel Crown, #B 152 Graduate Pediatric Clinic

D1351 – Sealant, per tooth, #S 30 Graduate Pediatric Clinic

D1351 – Sealant, per tooth, #T 30 Graduate Pediatric Clinic

### Conscious Sedation

D9248 – Non-Intravenous Conscious Sedation **75** Graduate Pediatric Clinic

Follow-up 1 (3-month) **80**

D0120 – Periodic Oral Evaluation 27 Graduate Pediatric Clinic

D1120 – Prophylaxis – child 34 Graduate Pediatric Clinic

D1206 – Topical Fluoride Varnish 19 Graduate Pediatric Clinic

Follow-up 2 (6-month) **80**

D0120 – Periodic Oral Evaluation 27 Graduate Pediatric Clinic

D1120 – Prophylaxis – child 34 Graduate Pediatric Clinic

D1206 – Topical Fluoride Varnish 19 Graduate Pediatric Clinic

|                                         |            |                           |
|-----------------------------------------|------------|---------------------------|
| Follow-up 3 (12-month)                  | <b>103</b> |                           |
| D0120 – Periodic Oral Evaluation        | 27         | Graduate Pediatric Clinic |
| D0272 – Bitewings, Two Films (one year) | 23         | Graduate Pediatric Clinic |
| D1120 – Prophylaxis – child             | 34         | Graduate Pediatric Clinic |
| D1206 – Topical Fluoride Varnish        | 19         | Graduate Pediatric Clinic |
| Follow-up 4 (18-month)                  | <b>80</b>  |                           |
| D0120 – Periodic Oral Evaluation        | 27         | Graduate Pediatric Clinic |
| D1120 – Prophylaxis – child             | 34         | Graduate Pediatric Clinic |
| D1206 – Topical Fluoride Varnish        | 19         | Graduate Pediatric Clinic |
| Follow-up 5 (24-month)                  | <b>103</b> |                           |
| D0120 – Periodic Oral Evaluation        | 27         | Graduate Pediatric Clinic |
| D0272 – Bitewings, Two Films (one year) | 23         | Graduate Pediatric Clinic |
| D1120 – Prophylaxis – child             | 34         | Graduate Pediatric Clinic |
| D1206 – Topical Fluoride Varnish        | 19         | Graduate Pediatric Clinic |
| Recurrent Caries                        | <b>186</b> |                           |
| D2391 – Resin, 1-surface, posterior     | 93         | Graduate Pediatric Clinic |
| D2391 – Resin, 1-surface, posterior     | 93         | Graduate Pediatric Clinic |

---

Note: <sup>a</sup>All costs are presented in 2011 US dollars. <sup>a</sup>American Dental Association CDT Codes. <sup>b</sup>Pre-Operative Medical Appointment includes a medical exam and anesthesia work-up. <sup>c</sup>Physician Physical Evaluation includes a medical exam. <sup>d</sup>Non-Intravenous Conscious Sedation includes medical monitoring and sedation medication. <sup>e</sup>Graduate Pediatric Clinic= Dental treatment performed under conscious sedation and traditional chair-side dentistry at the University of North Carolina is billed according to the School of Dentistry 2011-2012 Graduate Pediatric Dentistry Program Fee Schedule. <sup>f</sup>UNC Hospitals=University of North Carolina Hospitals typical Medicaid reimbursement for dental patients undergoing general anesthesia. <sup>g</sup>Faculty Dental Practice=Dental treatment performed under general anesthesia at the University of North Carolina is billed according to the School of Dentistry 2011-2012 Faculty Dental Practice Fee Schedule.

**Appendix Table 3.** Supplement to Table 2: Detailed Micro-costing for the Treatment of Severe Early Childhood Caries under General Anesthesia and Conscious Sedation, 2015.

| Description                                    | Cost(\$) <sup>+</sup> | Source                                 |
|------------------------------------------------|-----------------------|----------------------------------------|
| <i>General Anesthesia Total Costs</i>          | <b><u>12531</u></b>   |                                        |
| New Patient Exam                               |                       |                                        |
| D0140 <sup>a</sup> —Limited Oral Evaluation    | <b>40</b>             | Graduate Pediatric Clinic <sup>e</sup> |
| Pre-Operative Medical Appointment <sup>b</sup> | <b>300</b>            | UNC Hospitals <sup>f</sup>             |
| Hospital and Anesthesia                        | <b>9145</b>           |                                        |
| Operating Room                                 | 3094                  | UNC Hospitals                          |
| Supplies                                       | 700                   | UNC Hospitals                          |
| Anesthesia                                     | 1996                  | UNC Hospitals                          |
| Anesthesia Support Staff                       | 1959                  | UNC Hospitals                          |
| Recovery Room                                  |                       |                                        |
| Phase I (30 min)                               | 1235                  | UNC Hospitals                          |
| Phase II (30 min)                              | 161                   | UNC Hospitals                          |
| Treatment                                      | <b>3046</b>           |                                        |
| D0150 – Comprehensive Oral Exam                | 108                   | Dental Faculty Practice <sup>g</sup>   |
| D0210 – Intraoral Radiographs, Full Series     | 127                   | Dental Faculty Practice                |
| D1120 – Prophylaxis - child                    | 42                    | Dental Faculty Practice                |
| D1203 – Topical Fluoride                       | 43                    | Dental Faculty Practice                |
| D9420 – Hospital Call                          | 538                   | Dental Faculty Practice                |
| D2391 – Resin, 1-surface, posterior, #A(O)     | 179                   | Dental Faculty Practice                |
| D2391 – Resin, 1-surface, posterior, #J(O)     | 179                   | Dental Faculty Practice                |
| D7140 – Extract, erupted tooth, #E             | 159                   | Dental Faculty Practice                |
| D7140 – Extract, erupted tooth, #F             | 159                   | Dental Faculty Practice                |
| D2930 – Stainless Steel Crown, #B              | 308                   | Dental Faculty Practice                |
| D2930 – Stainless Steel Crown, #I              | 308                   | Dental Faculty Practice                |
| D3220 – Therapeutic Pulpotomy, #I              | 174                   | Dental Faculty Practice                |
| D2335 – Resin, 4+ surface, anterior, #D(MIDFL) | 235                   | Dental Faculty Practice                |
| D2335 – Resin, 4+ surface, anterior, #G(MIDFL) | 235                   | Dental Faculty Practice                |
| D1351 – Sealant, per tooth, #K                 | 63                    | Dental Faculty Practice                |
| D1351 – Sealant, per tooth, #L                 | 63                    | Dental Faculty Practice                |
| D1351 – Sealant, per tooth, #S                 | 63                    | Dental Faculty Practice                |
| D1351 – Sealant, per tooth, #T                 | 63                    | Dental Faculty Practice                |
| Complication (laryngospasm)                    |                       |                                        |
| Muscle relaxant                                | 100                   | UNC Hospitals                          |
| <i>Conscious Sedation Total Costs</i>          | <b><u>1842</u></b>    |                                        |

## Visit 1

### New Patient Exam

|                                                         |            |                           |
|---------------------------------------------------------|------------|---------------------------|
| D0150 – Comprehensive Oral Exam                         | <b>50</b>  | Graduate Pediatric Clinic |
| Physician Physical Evaluation <sup>c</sup>              | <b>120</b> | UNC Hospitals             |
| Treatment                                               | <b>562</b> |                           |
| D0210 – Intraoral Radiographs, Full Series              | 80         | Graduate Pediatric Clinic |
| D1120 – Prophylaxis - child                             | 36         | Graduate Pediatric Clinic |
| D1206 – Topical Fluoride Varnish                        | 24         | Graduate Pediatric Clinic |
| D2391 – Resin, 1-surface, posterior, #J(O)              | 102        | Graduate Pediatric Clinic |
| D2930 – Stainless Steel Crown, #I                       | 160        | Graduate Pediatric Clinic |
| D3220 – Therapeutic Pulpotomy, #I                       | 98         | Graduate Pediatric Clinic |
| D1351 – Sealant, per tooth, #K                          | 31         | Graduate Pediatric Clinic |
| D1351 – Sealant, per tooth, #L                          | 31         | Graduate Pediatric Clinic |
| Conscious Sedation                                      |            |                           |
| D9248 – Non-Intravenous Conscious Sedation <sup>d</sup> | <b>80</b>  | Graduate Pediatric Clinic |

## Visit 2

|                                            |            |                           |
|--------------------------------------------|------------|---------------------------|
| Treatment                                  | <b>546</b> |                           |
| D2390 – Resin-based crown, anterior, #D    | 182        | Graduate Pediatric Clinic |
| D7140 – Extract, erupted tooth, #E         | 91         | Graduate Pediatric Clinic |
| D7140 – Extract, erupted tooth, #F         | 91         | Graduate Pediatric Clinic |
| D2390 – Resin-based crown, anterior, #G    | 182        | Graduate Pediatric Clinic |
| Conscious Sedation                         |            |                           |
| D9248 – Non-Intravenous Conscious Sedation | <b>80</b>  | Graduate Pediatric Clinic |

## Visit 3

|                                            |            |                           |
|--------------------------------------------|------------|---------------------------|
| Treatment                                  | <b>324</b> |                           |
| D2391 – Resin, 1-surface, posterior, #A(O) | 102        | Graduate Pediatric Clinic |
| D2930 – Stainless Steel Crown, #B          | 160        | Graduate Pediatric Clinic |
| D1351 – Sealant, per tooth, #S             | 31         | Graduate Pediatric Clinic |
| D1351 – Sealant, per tooth, #T             | 31         | Graduate Pediatric Clinic |
| Conscious Sedation                         |            |                           |
| D9248 – Non-Intravenous Conscious Sedation | <b>80</b>  | Graduate Pediatric Clinic |

## Follow-up 1 (3-month)

|                                  |           |                           |
|----------------------------------|-----------|---------------------------|
|                                  | <b>89</b> |                           |
| D0120 – Periodic Oral Evaluation | 29        | Graduate Pediatric Clinic |
| D1120 – Prophylaxis – child      | 36        | Graduate Pediatric Clinic |
| D1206 – Topical Fluoride Varnish | 24        | Graduate Pediatric Clinic |

## Follow-up 2 (6-month)

|                                  |           |                           |
|----------------------------------|-----------|---------------------------|
|                                  | <b>89</b> |                           |
| D0120 – Periodic Oral Evaluation | 29        | Graduate Pediatric Clinic |
| D1120 – Prophylaxis – child      | 36        | Graduate Pediatric Clinic |
| D1206 – Topical Fluoride Varnish | 24        | Graduate Pediatric Clinic |

|                                         |            |                           |
|-----------------------------------------|------------|---------------------------|
| Follow-up 3 (12-month)                  | <b>112</b> |                           |
| D0120 – Periodic Oral Evaluation        | 29         | Graduate Pediatric Clinic |
| D0272 – Bitewings, Two Films (one year) | 23         | Graduate Pediatric Clinic |
| D1120 – Prophylaxis – child             | 36         | Graduate Pediatric Clinic |
| D1206 – Topical Fluoride Varnish        | 24         | Graduate Pediatric Clinic |
| Follow-up 4 (18-month)                  | <b>89</b>  |                           |
| D0120 – Periodic Oral Evaluation        | 29         | Graduate Pediatric Clinic |
| D1120 – Prophylaxis – child             | 36         | Graduate Pediatric Clinic |
| D1206 – Topical Fluoride Varnish        | 24         | Graduate Pediatric Clinic |
| Follow-up 5 (24-month)                  | <b>112</b> |                           |
| D0120 – Periodic Oral Evaluation        | 29         | Graduate Pediatric Clinic |
| D0272 – Bitewings, Two Films (one year) | 23         | Graduate Pediatric Clinic |
| D1120 – Prophylaxis – child             | 36         | Graduate Pediatric Clinic |
| D1206 – Topical Fluoride Varnish        | 24         | Graduate Pediatric Clinic |
| Recurrent Caries                        | <b>204</b> |                           |
| D2391 – Resin, 1-surface, posterior     | 102        | Graduate Pediatric Clinic |
| D2391 – Resin, 1-surface, posterior     | 102        | Graduate Pediatric Clinic |

---

Note: <sup>a</sup>All costs are presented in 2015 US dollars. <sup>a</sup>American Dental Association CDT Codes. <sup>b</sup>Pre-Operative Medical Appointment includes a medical exam and anesthesia work-up. <sup>c</sup>Physician Physical Evaluation includes a medical exam. <sup>d</sup>Non-Intravenous Conscious Sedation includes medical monitoring and sedation medication. <sup>e</sup>Graduate Pediatric Clinic= Dental treatment performed under conscious sedation and traditional chair-side dentistry at the University of North Carolina is billed according to the School of Dentistry 2015-2016 Graduate Pediatric Dentistry Program Fee Schedule. <sup>f</sup>UNC Hospitals=University of North Carolina Hospitals typical Medicaid reimbursement for dental patients undergoing general anesthesia. <sup>g</sup>Faculty Dental Practice=Dental treatment performed under general anesthesia at the University of North Carolina is billed according to the School of Dentistry 2015-2016 Faculty Dental Practice Fee Schedule.

**Appendix Table 4.** Outcomes of Treating Severe Early Childhood Caries using General Anesthesia (GA) and Conscious Sedation (CS)

| Description                                                                                         | CF months | Range              |
|-----------------------------------------------------------------------------------------------------|-----------|--------------------|
| <b>Outcomes – Caries Free Months</b>                                                                |           |                    |
| Successful treatment without additional caries-related treatment needs <sup>+</sup>                 | 21        | 19-23 <sup>a</sup> |
| Successful treatment with additional caries-related treatment needs                                 | 19        | 11-20 <sup>b</sup> |
| Partial Treatment                                                                                   | 0         | 0                  |
| No treatment                                                                                        | 0         | 0                  |
| Unsuccessful CS visit 1 followed by successful GA without additional caries-related treatment needs | 20        | 18-22              |
| Unsuccessful CS visit 1 with successful GA with caries-related treatment needs                      | 18        | 9-22               |
| Unsuccessful CS visit 2 with successful GA without caries-related treatment needs                   | 19        | 17-21              |
| Unsuccessful CS visit 2 with successful GA with caries-related treatment needs                      | 17        | 8-21               |
| Unsuccessful CS visit 3 with successful GA without caries-related treatment needs                   | 18        | 16-20              |
| Unsuccessful CS visit 3 with successful GA with caries-related treatment needs                      | 16        | 8-20               |

Note: <sup>+</sup>Caries-related treatment needs are the presence of dental caries that require treatment and are detected at a follow-up dental visit after successful dental rehabilitation under general anesthesia or conscious sedation. <sup>a</sup>Assumption: comprehensive treatment occurs by three months of the new patient intake. <sup>b</sup>Assumption: caries-related treatment needs are detected and treated within two months.



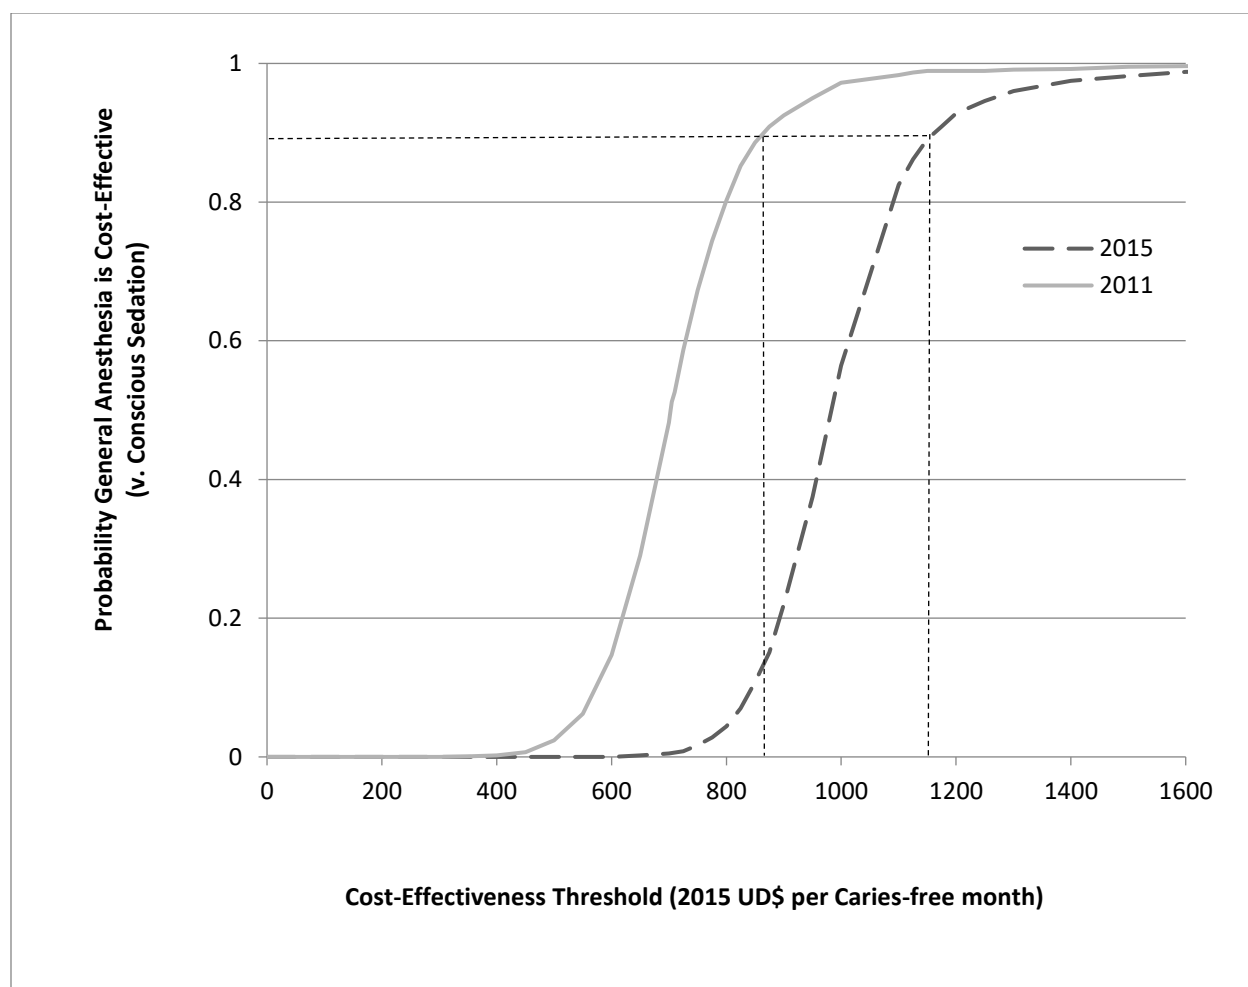

**Appendix Figure 1.** Cost-Effectiveness Acceptability Curve of Treating Severe Early Childhood Caries under General Anesthesia (GA) Compared to Conscious Sedation (CS) for 2011 and 2015. *In 2011, there was a 90 percent probability that GA was more cost-effective than CS if Medicaid was willing to pay \$878 more per caries-free month (Figure 2). Similarly, if Medicaid was willing to pay \$1,162 more per caries-free month, there was a 90 percent chance that GA was more cost-effective than CS in 2015 (Figure 2).*

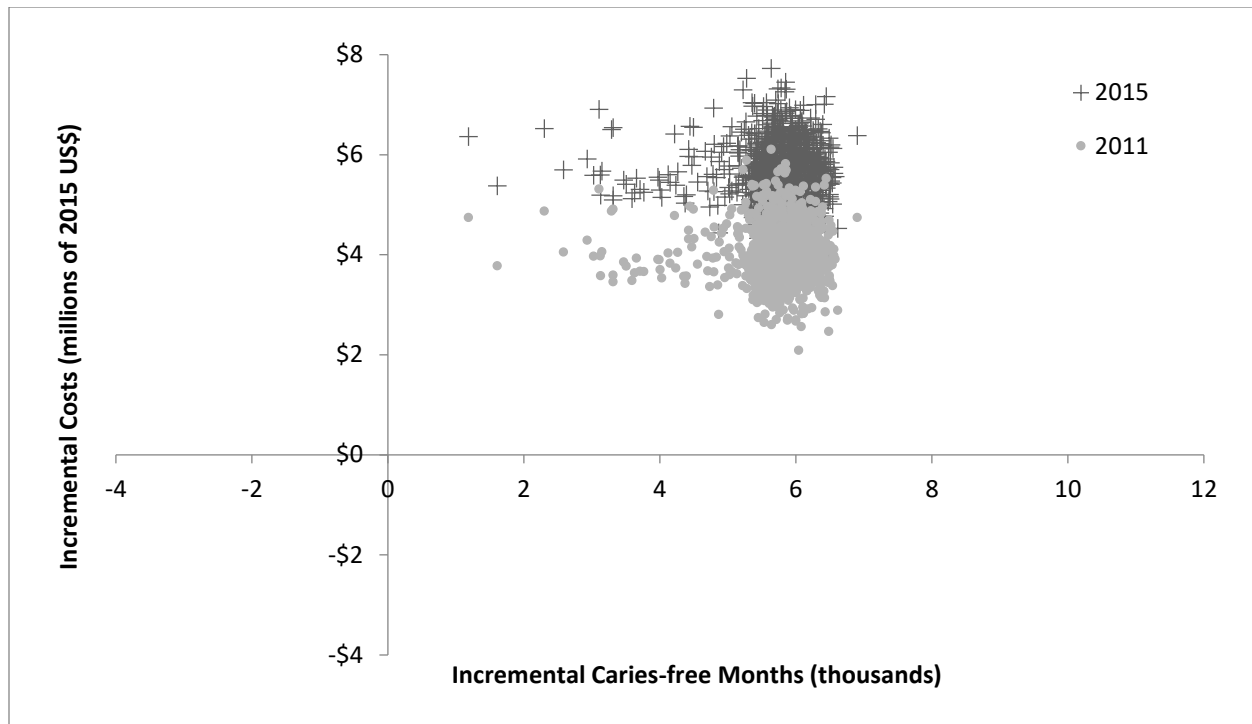

**Appendix Figure 2.** Incremental Costs and Benefits of Treating Severe Early Childhood Caries (S-ECC) under General Anesthesia (GA) Compared to Conscious Sedation in 2011 (circles) and 2015 (pluses). Each data point in the cost-effectiveness plane represents one of a 1,000 simulations, each of which models a cohort of 1,000 healthy three year-old children with S-ECC. The slope of each data point is the ICER, which is the ratio of incremental costs over incremental caries-free months. *The cost-effectiveness plane illustrates that GA results in higher incremental costs and more incremental caries-free months compared to CS in 100 percent of the simulations for both 2011 and 2015 (Northeast quadrant).*
